# Supplementary material
Source: PubMed Central journal article supplement (PMC3446717)
Supplement: mmc1.pdf [file mmc1.pdf]

# **Cell Mechanics, Structure, and Function Are Regulated by the Stiffness of the Three-Dimensional Microenvironment**

J. Chen, J. Irianto, S. Inamdar, P. Pravincumar, D. A. Lee, D. L. Bader, and M. M. Knight

Institute for Bioengineering, School of Engineering and Materials Science, Queen Mary University of London, London, United Kingdom

## Supplementary information

For the neo-Hookean model, the energy function is given by,

$$U = C_1(\lambda_1^2 + \lambda_2^2 + \lambda_3^2 - 3) \quad (\text{Eq. A1})$$

The Cauchy stress at direction 1 is given by,

$$\sigma_1 = \lambda_1 \frac{dU}{d\lambda_1} - p = 2C_1\lambda_1^2 - p \quad (\text{Eq. A2})$$

For uni-axial test, the stretch ratios  $\lambda_i$  is given by,

$$\lambda_1 = \lambda, \lambda_2 = \lambda_3 = \lambda^{-\frac{1}{2}}, \sigma_2 = \sigma_3 = 0 \quad (\text{Eq. A3})$$

$$\sigma_1 = 2C_1(\lambda_1^2 - \lambda_3^2) \quad (\text{Eq. A4})$$

$$\sigma_1 = 2C_1(\lambda^2 - \lambda^{-1}) = 2C_1(\lambda^2 - \lambda^{-1}) \quad (\text{Eq. A5})$$

$$\lambda^2 = 1 + 2e, \text{ where } e \text{ is the Green strain.} \quad (\text{Eq. A6})$$

In the case of infinitesimal strain, it gives,

$$\sigma_1 = 2C_1 \left\{ 1 + 2e - (1 + 2e)^{-\frac{1}{2}} \right\} = 2C_1 \left\{ 1 + 2e - \left[ 1 - \frac{1}{2}2e + \frac{1}{2} \times \frac{1}{2} \times \frac{3}{2} (2e)^2 + \dots \right] \right\} = 6C_1e \quad (\text{Eq. A7})$$

$$\text{Therefore, } E = 6C_1 \quad (\text{Eq. A8})$$

For the Ogden model, the energy function is given by,

$$U = \sum_{i=1}^n \frac{2\mu_i}{\alpha_i^2} (\lambda_1^{\alpha_i} + \lambda_2^{\alpha_i} + \lambda_3^{\alpha_i} - 3) \quad (\text{Eq. A9})$$

$$\sigma_1 = \sum_{i=1}^n \lambda_1 \frac{dU}{d\lambda_1} - p = \sum_{i=1}^n \frac{2\mu_i}{\alpha_i} \lambda_1^{\alpha_i} - p \quad (\text{Eq. A10})$$

For the uniaxial test,

$$\sigma_1 = \sum_{i=1}^n \left( \frac{2\mu_i}{\alpha_i} \lambda_1^{\alpha_i} - \frac{2\mu_i}{\alpha_i} \lambda_3^{\alpha_i} \right) = \sum_{i=1}^n \left( \frac{2\mu_i}{\alpha_i} \lambda^{\alpha_i} - \frac{2\mu_i}{\alpha_i} \lambda^{-\frac{\alpha_i}{2}} \right) \quad (\text{Eq. A11})$$

In the case of infinitesimal strain, it gives,

$$\sigma_1 = \sum_{i=1}^n \frac{2\mu_i}{\alpha_i} \left\{ \left[ 1 + \alpha_i e + \frac{\alpha_i}{4} \left( \frac{\alpha_i}{2} - 1 \right) \times 4e^2 + \dots \right] - \left[ 1 - \frac{\alpha_i}{2} e + \frac{\alpha_i}{8} \left( \frac{\alpha_i}{4} + 1 \right) \times 4e^2 + \dots \right] \right\} \approx \sum_{i=1}^n \frac{2\mu_i}{\alpha_i} \left( \frac{3}{2} \alpha_i e \right) = 3 \sum_{i=1}^n \mu_i e \quad (\text{Eq. A12})$$

Therefore,

$$E = 3 \sum \mu_i \quad (\text{Eq. A13})$$
